# Supplementary material for: Altered Immune Activation and IL-23 Signaling in Response to Candida albicans in Autoimmune Polyendocrine Syndrome Type 1
Source: PubMed Central journal article supplement (PMC5585148; doi:10.3389/fimmu.2017.01074), 2017-09-01

## SUPPLEMENTARY FIGURE 2. Gating strategy for flow cytometric analyses

The figure gives an overview of the IL-23 response found in monocytes in patients versus controls. **A.** Monocyte-gating according to the SSC/FSC. **B.** Gating strategy for CD14+ monocytes within the monocyte-gate from A. **C.** A representative illustration of the lack of IL-23 response in monocytes from an APS-1 patient when stimulated with curdlan. **D.** A typically IL-23 response seen in monocytes in a healthy control after stimulation with curdlan.

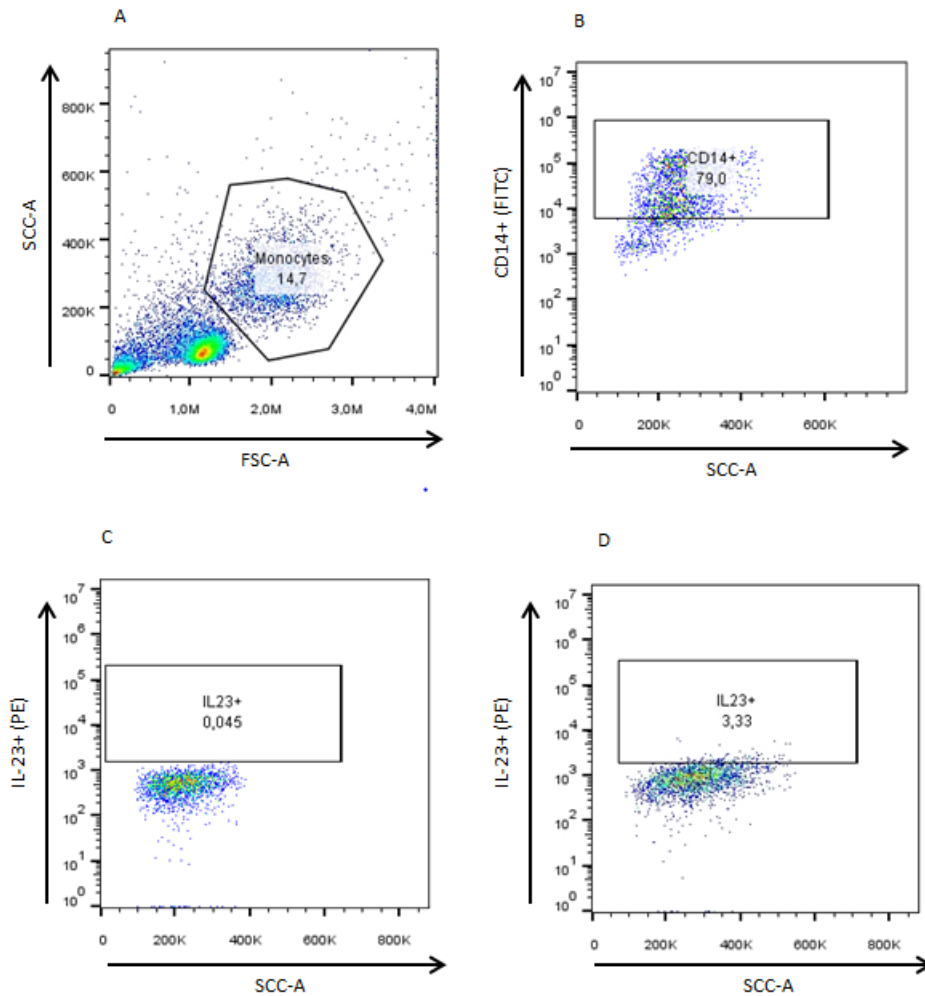

Supplement: image_2.pdf [file image_2.pdf]
