# Supplementary material for: Altered Immune Activation and IL-23 Signaling in Response to Candida albicans in Autoimmune Polyendocrine Syndrome Type 1
Source: PubMed Central journal article supplement (PMC5585148; doi:10.3389/fimmu.2017.01074), 2017-09-01
Supplement: table_1.pdf [file table_1.pdf]

**Supplementary Table 1. Change in immune mediators in response to *C. Albicans* in APS-1 patients and controls.**

The table gives the changes in levels of immune mediators in patients and controls after stimulation of full blood with *Candida albicans*. The table gives the median (and ranges) of the change in mediator levels. The Mann Whitney U test was used for the statistical comparison. Significant differences are marked bold. Lower limit of quantification gives the lowest concentration of an analyte in a sample that can be reliably detected and at which the total error meets the laboratory's requirements for accuracy. MRBM's requirement for accuracy is the concentration of an analyte at which the coefficient of variation of replicate standard sample is 30%. All mediator concentrations are given in pg/ml. Nd; not detectable.

| Mediator                          | Lower limit of quantitation | APS-1                  | Controls               | P value          |
|-----------------------------------|-----------------------------|------------------------|------------------------|------------------|
| <i>INTERLEUKINS</i>               |                             |                        |                        |                  |
| IL1A                              | 3.9                         | 30 (10-130)            | 100 (0.00-410)         | 0.2324           |
| <b>IL1B</b>                       | 2.9                         | 1139 (472.10-3604)     | 3030 (114.90-10050)    | <b>0.0129</b>    |
| IL2                               | 8.9                         | 156 (0.00-3218)        | 175.1 (88.1-827.10)    | 0.9429           |
| IL3                               | 16                          | Nd                     | Nd                     | -                |
| IL4                               | 28                          | 52 (0.00-76.00)        | 76 (0.00-106)          | 0.1627           |
| IL5                               | 10                          | Nd                     | Nd                     | -                |
| IL6                               | 7.2                         | 10796 (389.20-62234)   | 24293 (361.8-96285)    | 0.1627           |
| <b>IL7</b>                        | 12                          | 130 (-43-374)          | 0.0 (0.00-18)          | <b>0.0003</b>    |
| <b>IL10</b>                       | 5.1                         | 44.20 (0.8-275.2)      | 245.9 (1.8-1195)       | <b>0.0154</b>    |
| IL12p70                           | 43                          | Nd                     | Nd                     | -                |
| <b>IL12p40</b>                    | 330                         | 140 (0.00-870)         | 590 (0.00-1270)        | <b>0.0101</b>    |
| IL15                              | 720                         | Nd                     | Nd                     | -                |
| IL17                              | 3.3                         | 8.7 (0.0-153.7)        | 22.7 (4.6-76.7)        | 0.1224           |
| <b>IL18</b>                       | 19                          | 95 (-21-167)           | 223 (29-454)           | <b>0.0005</b>    |
| IL22                              | -                           | 67.95 (-226.5-315.0)   | 220.7 (-168.8-1287)    | 0.1688           |
| <b>IL23</b>                       | 1400                        | 0.00                   | 0.00 (0-800)           | <b>0.0411</b>    |
| <i>GROWTH FACTORS</i>             |                             |                        |                        |                  |
| BDGF                              | 56                          | 0.00 (-2700-3900)      | 530 (-5200-6500)       | 0.4156           |
| <b>CSF2</b>                       | 71                          | 347 (0-1439)           | 1049 (0-4969)          | <b>0.0128</b>    |
| <b>VEGFA</b>                      | 47                          | 20.9 (-46.3-120.5)     | 308.8 (65-400)         | <b>&lt;0.001</b> |
| <i>CHEMOKINES</i>                 |                             |                        |                        |                  |
| CCL2                              | 24                          | 63577 (1784-204535)    | 62690 (1058-207566)    | 0.8646           |
| CCL3                              | 15                          | 53464 (3056-162976)    | 98769 (2240-225965)    | 0.2284           |
| CCL4                              | 37                          | 177577 (7799-418540)   | 263443 (5561-441411)   | 0.2066           |
| CCL5                              | 52                          | -100 (-8000-17300)     | 2700 (-14000-28000)    | 0.1543           |
| CCL11                             | 71                          | -44.0 (-210-9)         | -21 (-90-29)           | 0.4678           |
| CXCL8                             | 2.6                         | 495742 (11776-951722)  | 677380 (25072-1329000) | 0.2518           |
| <i>IMMUNOMODULATORY CYTOKINES</i> |                             |                        |                        |                  |
| <b>INFG</b>                       | 2.3                         | 86.40 (1.2-370)        | 388.7 (10.7-4108)      | <b>0.0005</b>    |
| <b>LTA</b>                        | 27                          | 46 (0-74)              | 110 (0-164)            | <b>0.0003</b>    |
| <b>TNF</b>                        | 18                          | 3982 (1142-13682)      | 14982 (1042-26082)     | <b>0.0088</b>    |
| <i>ADHESION MOLECULES</i>         |                             |                        |                        |                  |
| ICAM1                             | 4000                        | 0.00 (-33000-18000)    | 0.0 (-5000-11000)      | 0.5778           |
| VCAM1                             | 2500                        | -18000 (-116000-50000) | 12000 (-44000-52000)   | 0.3836           |
| <i>MATRIX METALLOPROTEASES</i>    |                             |                        |                        |                  |
| MMP3                              | 51                          | 300 (-3000-900)        | 200 (-1000-1100)       | 0.6999           |
| MMP9                              | 107 000                     | 59000 (0-154000)       | 26000 (0-69000)        | 0.0660           |

*COAGULATION FACTORS*

|           |                     |                                                   |                                                              |               |
|-----------|---------------------|---------------------------------------------------|--------------------------------------------------------------|---------------|
| <b>C3</b> | 2.5x10 <sup>6</sup> | 0.00 (-1.4x10 <sup>8</sup> -1.5x10 <sup>8</sup> ) | 6x10 <sup>7</sup> (-8x10 <sup>7</sup> -1.7x10 <sup>8</sup> ) | <b>0.0486</b> |
| F7        | 28000               | -20000 (-129000-23000)                            | -8000 (-37000-19000)                                         | 0.3837        |
| FGA       | 1.1x10 <sup>7</sup> | 0.0 (-3x10 <sup>8</sup> -3x10 <sup>8</sup> )      | 1x10 <sup>8</sup> (-1x10 <sup>8</sup> -5x10 <sup>8</sup> )   | 0.0325        |
| VWF       | 2.5x10 <sup>7</sup> | 0.0 (-6x10 <sup>6</sup> -1.2x10 <sup>7</sup> )    | 0.0 (-1.3x10 <sup>7</sup> -1.1x10 <sup>7</sup> )             | 0.5491        |

*SERUM PROTEINS*

|           |                     |                                                                |                                                  |               |
|-----------|---------------------|----------------------------------------------------------------|--------------------------------------------------|---------------|
| B2M       | 5000                | 0.0 (-330000-510000)                                           | 80000 (-70000-240000)                            | 0.4667        |
| FTL       | 860                 | 1000 (-2700-27000)                                             | 13000 (-1000-37000)                              | 0.6800        |
| <b>HP</b> | 5.3x10 <sup>6</sup> | 4x10 <sup>7</sup> (-1.8x10 <sup>8</sup> -7.1x10 <sup>8</sup> ) | 0.0 (-1.6x10 <sup>9</sup> -0.8x10 <sup>9</sup> ) | <b>0.0083</b> |

*TRADITIONAL MARKERS*

|            |       |                                       |                                    |               |
|------------|-------|---------------------------------------|------------------------------------|---------------|
| <b>CRP</b> | 48000 | -60000 (-4x10 <sup>6</sup> -(-10000)) | 0.0 (-1.6x10 <sup>6</sup> -800000) | <b>0.0083</b> |
|------------|-------|---------------------------------------|------------------------------------|---------------|

*OTHERS*

|                 |                     |                                                                 |                                                                |               |
|-----------------|---------------------|-----------------------------------------------------------------|----------------------------------------------------------------|---------------|
| <b>GC</b>       | 1.6x10 <sup>6</sup> | -1.4x10 <sup>7</sup> (-7.1x10 <sup>7</sup> -8x10 <sup>6</sup> ) | 1x10 <sup>6</sup> (-5x10 <sup>7</sup> -1.8x10 <sup>7</sup> )   | <b>0.0191</b> |
| <b>SERPINA1</b> | 2.6x10 <sup>7</sup> | -0.1x10 <sup>9</sup> (-3.5x10 <sup>8</sup> -1x10 <sup>7</sup> ) | 7x10 <sup>7</sup> (-2.4x10 <sup>8</sup> -1.6x10 <sup>8</sup> ) | <b>0.0487</b> |
| IL1RN           | 302                 | 1918 (0-3167)                                                   | 2073 (381-3448)                                                | 0.4937        |
| KITL            | 136                 | 93 (56-408)                                                     | 226 (26-366)                                                   | 0.0605        |
| TIMP1           | 640                 | 15000 (-6000-95000)                                             | 21000 (-12000-37000)                                           | 0.9886        |
| TNFRSF1B        | 420                 | 4400 (0-11100)                                                  | 6000 (500-9900)                                                | 0.1151        |

---
